# Supplementary material for: Polymeric acid-doped transparent carbon nanotube electrodes for organic solar cells with the longest doping durability
Source: Royal Society of Chemistry journal article supplement (doi:10.1039/c8ta03383h), 2018-01-01
Supplement: c8ta03383h1.pdf [file c8ta03383h1.pdf]

## *Electronic Supplementary Information*

# **Polymeric Acid-doped Transparent Carbon Nanotube Electrodes in Organic Solar Cells with the Longest Doping Durability**

*Il Jeon,<sup>1</sup> Clement Delacou,<sup>1</sup> Hiroshi Okada,<sup>1</sup> Graham E. Morse,<sup>2</sup> Tae-Hee Han,<sup>3</sup> Yuta Sato,<sup>4</sup> Anton Anisimov,<sup>5</sup> Kazu Suenaga,<sup>1,4</sup> Esko I. Kauppinen,<sup>6</sup> Shigeo Maruyama,<sup>\*1,7</sup> and Yutaka Matsuo<sup>\*1,8</sup>*

1 Department of Mechanical Engineering, The University of Tokyo, 7-3-1 Hongo, Bunkyo-ku, Tokyo 113-8656, Japan

2 Chilworth Technical Centre, Merck Chemicals Ltd., University Parkway, SO16 7QD Southampton, UK

3 Department of Materials Science and Engineering, University of California, Los Angeles, Los Angeles, CA 90095, USA

4 Nanomaterials Research Institute, National Institute of Advanced Industrial Science and Technology, Tsukuba 305-8565, Japan

5 Canatu Ltd., Konalankuja 5, FI-00390 Helsinki, Finland

6 Department of Applied Physics, Aalto University School of Science, FI-00076 Aalto, Finland

7 Research Institute for Energy Conservation, National Institute of Advanced Industrial Science and Technology, Tsukuba 305-8565, Japan

8 Hefei National Laboratory for Physical Sciences at the Microscale, University of Science and Technology of China, 96 Jinzhai Road, Hefei, Anhui 230026, China

## **Contents:**

### **1. Doping Effect Comparison between CNT and Graphene**

### **2. EDX Analysis**

### **3. TEM Images**

### **4. AFM Morphology Analysis**

### **5. Cross-sectional SEM**

### **6. Water Contact Angle Test**

### **7. Surfactant-added PEDOT:PSS-used Device**

### **8. Current Density–Voltage ( $J$ – $V$ ) Curves**

### **9. Statistical Analysis**

## 1. Doping Effect Comparison between CNT and Graphene

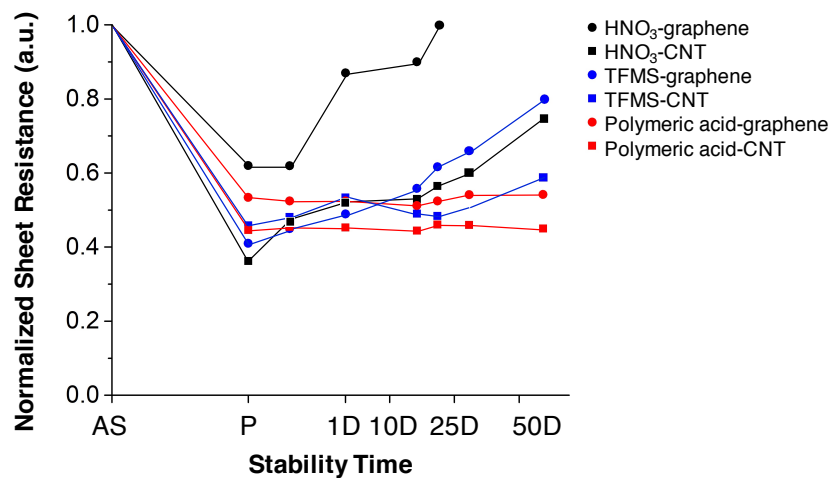

**Figure S1.** Normalized four-probe sheet resistance stability data for the three types of dopants applied to graphene and CNT electrodes.

## 2. EDX Analysis

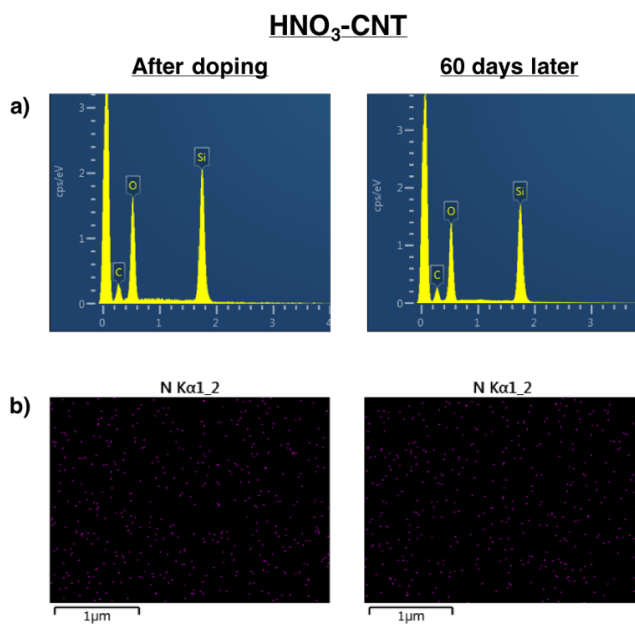

**Figure S2-1.** EDX analysis of a HNO<sub>3</sub>-CNT film after doping and 60 days later. (a) cps count vs keV spectra and (b) EDX chemical mapping of nitrogen.

## TFMS-CNT

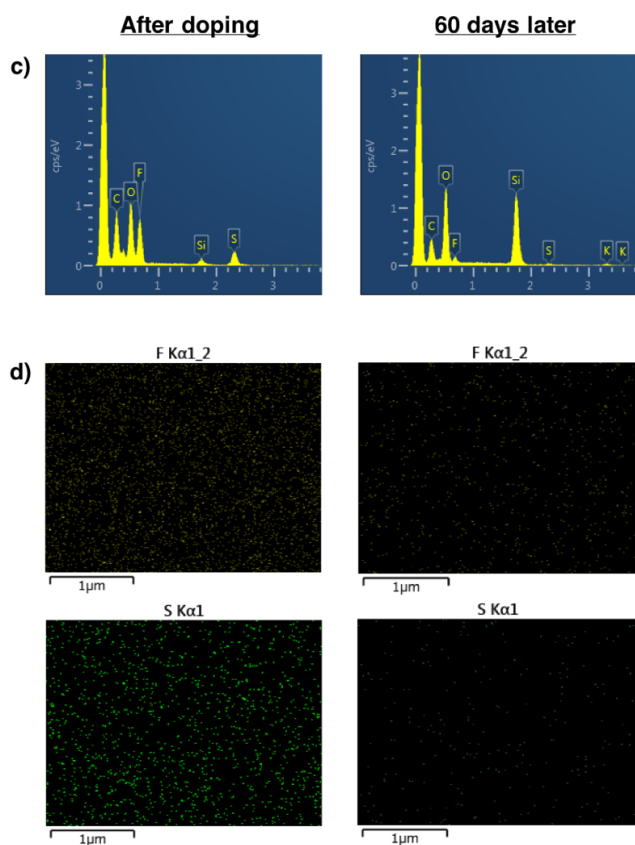

**Figure S2-2.** EDX analysis of a TFMS-CNT film after doping and 60 days later. (b) cps count vs keV spectra and (c) EDX chemical mapping of fluorine and sulphur.

## Polymeric acid-CNT

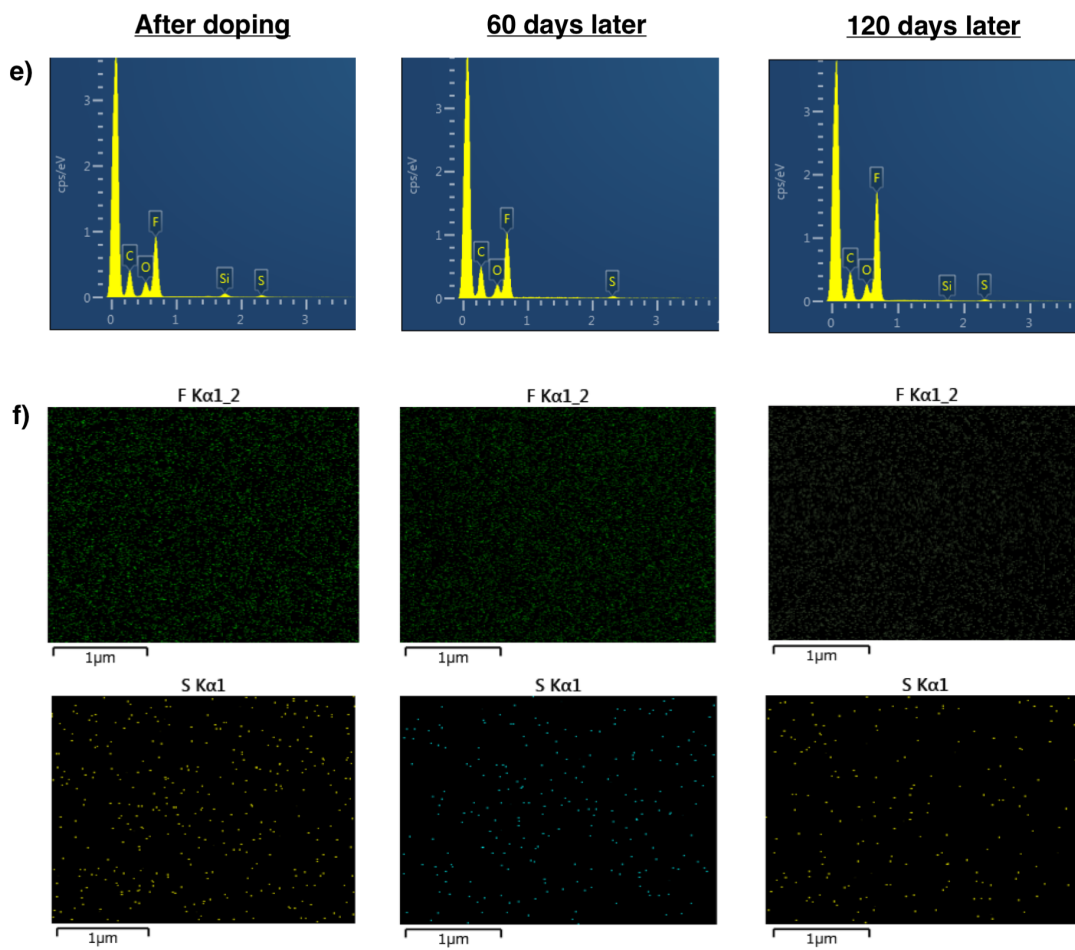

**Figure S2-3.** EDX analysis of a polymeric acid-CNT film after doping, 60 days later, and 120 days later. (b) cps count vs keV spectra and (c) EDX chemical mapping of fluorine and sulphur.

**Table S1.** EDX atomic weight% analysis results of HNO<sub>3</sub>-CNT, TFMS-CNT, and polymeric acid-CNT after doping and 60 days later.

| Sample Type           | Condition     | Atom | Average weight (%) | Error range (%) |
|-----------------------|---------------|------|--------------------|-----------------|
| HNO <sub>3</sub> -CNT | After doping  | C    | 9.50               | ±0.87           |
|                       |               | O    | 32.03              | ±0.78           |
|                       |               | Si   | 58.47              | ±0.66           |
|                       | 60 days later | C    | 9.70               | ±0.70           |
|                       |               | O    | 31.50              | ±0.26           |
|                       |               | Si   | 58.8               | ±0.94           |
| TFMS-CNT              | After doping  | C    | 20.71              | ±6.70           |
|                       |               | O    | 29.27              | ±1.76           |
|                       |               | F    | 23.61              | ±7.58           |
|                       |               | Si   | 12.06              | ±16.72          |
|                       |               | S    | 14.36              | ±4.68           |
|                       | 60 days later | C    | 11.55              | ±4.69           |
|                       |               | O    | 32.99              | ±0.95           |
|                       |               | F    | 1.96               | ±0.64           |
|                       |               | Si   | 52.26              | ±6.64           |
|                       |               | S    | 1.22               | ±0.47           |
| Polymeric acid-CNT    | After doping  | C    | 23.12              | ±3.90           |
|                       |               | O    | 9.01               | ±0.88           |
|                       |               | F    | 63.74              | ±2.55           |
|                       |               | Si   | 1.11               | ±0.15           |
|                       |               | S    | 3.03               | ±0.33           |
|                       | 60 days later | C    | 23.02              | ±5.86           |
|                       |               | O    | 12.60              | ±4.15           |
|                       |               | F    | 52.32              | ±15.13          |
|                       |               | Si   | 2.43               | ±2.63           |
|                       |               | S    | 4.11               | ±1.00           |

### 3. TEM Images

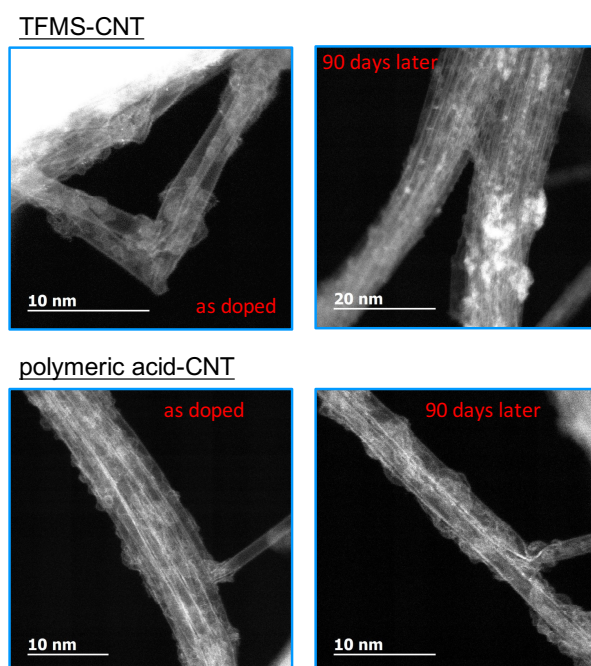

**Figure S3.** STEM images of TFMS-CNT and polymeric acid-CNT after doping and 90 days later.

### 4. AFM Morphology Analysis

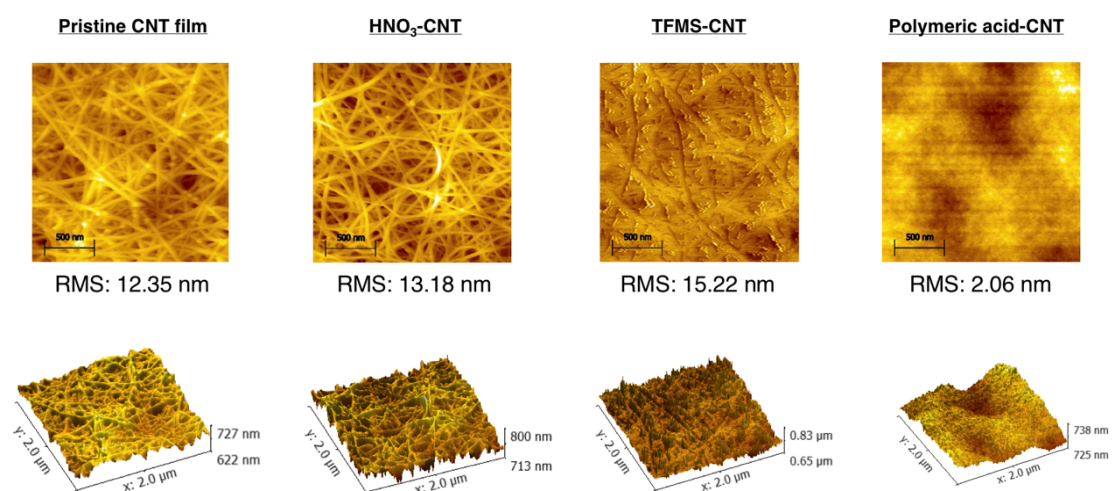

**Figure S4.** AFM 2D and 3D images, and the roughness mean squared of (a) a pristine CNT film, (b) a HNO<sub>3</sub>-CNT film, (c) a TFMS-CNT film, and (d) a polymeric acid-CNT film.

## 5. Cross-sectional SEM

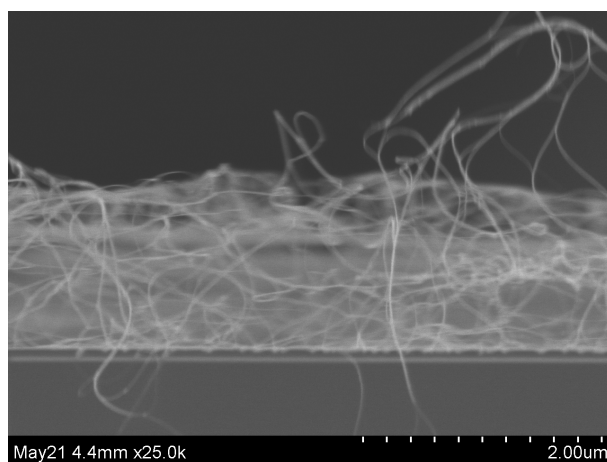

**Figure S5.** Cross-section SEM image of 2%-diluted Nafion-deposited CNT film.

## 6. Water Contact Angle Test

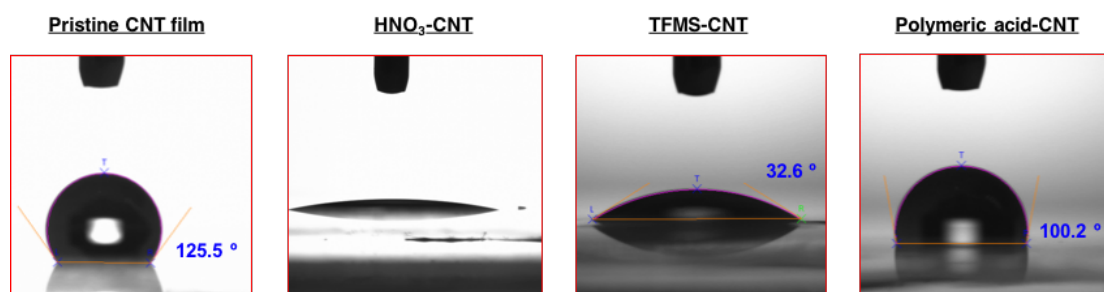

**Figure S6.** Water contact angle data showing the surface energy of (a) a pristine CNT film, (b) a HNO<sub>3</sub>-CNT film, (c) a TFMS-CNT film, and (d) a polymeric acid-CNT film.

## 7. Surfactant-added PEDOT:PSS-used Device

**Table S2.** Photovoltaic performance comparison of surfactant-added PEDOT:PSS-used devices and MoO<sub>3</sub>/PEDOT:PSS-used devices in a structural configuration of polymeric acid-CNT/HTL/ PBTZT-stat-BDTT-8:PC<sub>71</sub>BM/LiF/Al.

| Hole-Transporting Layer (HTL) | $J_{sc}$ (mA cm <sup>-2</sup> ) | $V_{oc}$ (V) | FF   | PCE (%) |
|-------------------------------|---------------------------------|--------------|------|---------|
| Surfactant-added PEDOT:PSS    | 14.9                            | 0.78         | 0.65 | 7.6     |
| MoO <sub>3</sub> /PEDOT:PSS   | 14.3                            | 0.80         | 0.70 | 8.0     |

## 8. Current Density–Voltage ( $J$ – $V$ ) Curves

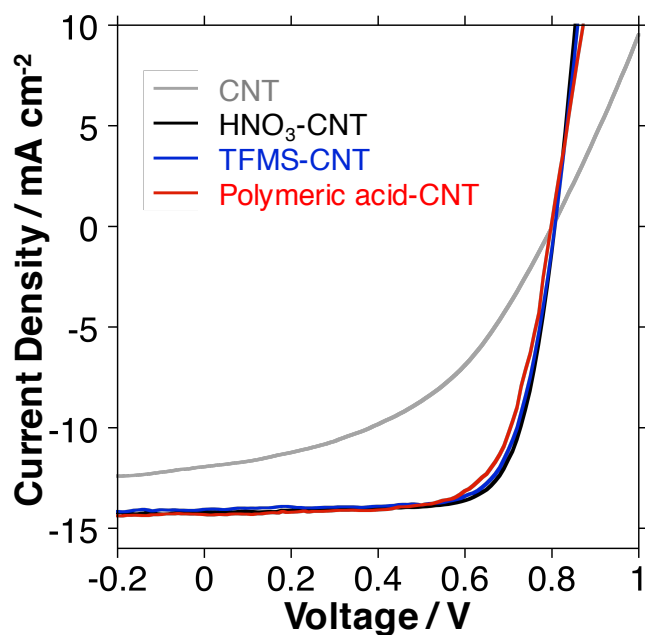

**Figure S7.**  $J$ – $V$  curves of the OSCs using bare CNT, HNO<sub>3</sub>-doped CNT films, TFMS-doped CNT films, and polymeric acid-doped CNT films.

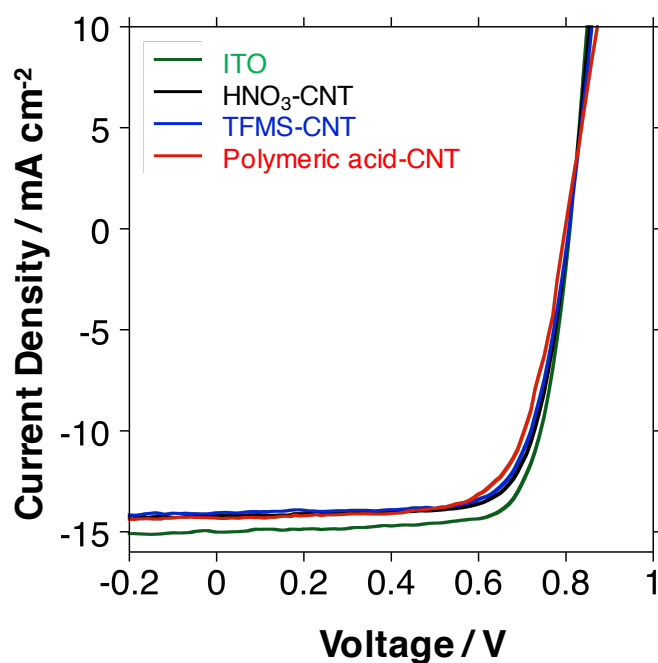

**Figure S8.**  $J$ – $V$  curves of the OSCs using ITO, HNO<sub>3</sub>-doped CNT films, TFMS-doped CNT films, and polymeric acid-doped CNT films.



## 9. Statistical Analysis

**Table S3.** Statistical Analysis of the average device PCEs and their error ranges.

| <b>Electrode</b>      | <b>PCE (%)<br/>After doping</b> | <b>PCE (%)<br/>60 days later</b> |
|-----------------------|---------------------------------|----------------------------------|
| ITO                   | 8.7 ±0.48                       | 6.5 ±0.53                        |
| CNT                   | 4.0 ±0.49                       | 2.0 ±0.97                        |
| HNO <sub>3</sub> -CNT | 8.2 ±0.17                       | 2.4 ±1.11                        |
| TFMS-CNT              | 8.1 ±0.38                       | 4.2 ±1.12                        |
| polymeric acid-CNT    | 7.0 ±0.94                       | 6.5 ±1.39                        |
